# Supplementary material
Source: MDPI journal article supplement (https://www.mdpi.com/2227-9717/10/4/778)
Supplement: s1 [file s1]

Supplementary Materials

# Effect of Ternary Deep Eutectic Solvents on Bagasse Cellulose and Lignin Structure in Low-Temperature Pretreatment

Yuanxing Yang, Lihong Zhao \*, Junli Ren and Beihai He

State Key Laboratory of Pulp and Paper Engineering, South China University of Technology, Guangzhou 510000, China; 201920126982@mail.scut.edu.cn (Y.Y.); renjunli@scut.edu.cn (J.R.); ppebhhe@scut.edu.cn (B.H.)

\* Correspondence: zhaolh@scut.edu.cn

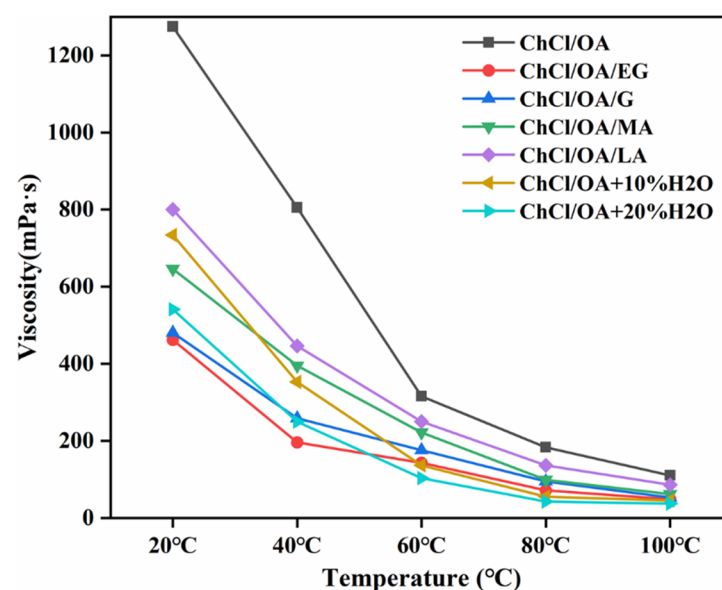

Figure S1. Effect of temperature on the viscosity of different ternary DES.

**Citation:** Yang, Y.; Zhao, L.; Ren, J.; He, B. Effect of Ternary Deep Eutectic Solvents on Bagasse Cellulose and Lignin Structure in Low-Temperature Pretreatment. *Processes* **2022**, *10*, 778. <https://doi.org/10.3390/pr10040778>

Academic Editors: Tiancheng Mu and Zhimin Xue

Received: date: 24 March 2022

Accepted: date: 13 April 2022

Published date: 15 April 2022

**Publisher's Note:** MDPI stays neutral with regard to jurisdictional claims in published maps and institutional affiliations.

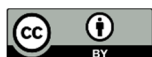

**Copyright:** © 2022 by the authors. Submitted for possible open access publication under the terms and conditions of the Creative Commons Attribution (CC BY) license (<https://creativecommons.org/licenses/by/4.0/>).

**Table S1.** The viscosity of different ternary DES at 90 °C.

| Pretreatment Solvent | ChCl-OA | ChCl-OA-EG | ChCl-OA-G | ChCl-OA-MA | ChCl-OA-LA | ChCl-OA+10%<br>H <sub>2</sub> O | ChCl-OA+20%<br>H <sub>2</sub> O |
|----------------------|---------|------------|-----------|------------|------------|---------------------------------|---------------------------------|
| Viscosity (mPa·s)    | 146.3   | 60.1       | 72.9      | 75.3       | 109.8      | 50.7                            | 38.2                            |

**Table S2.** The pH value of different ternary DES.

| Pretreatment Solvent | ChCl-OA | ChCl-OA-EG | ChCl-OA-G | ChCl-OA-MA | ChCl-OA-LA | ChCl-OA+10%<br>H <sub>2</sub> O | ChCl-OA+20%<br>H <sub>2</sub> O |
|----------------------|---------|------------|-----------|------------|------------|---------------------------------|---------------------------------|
| pH (20 °C)           | 2.33    | 3.02       | 3.22      | 2.22       | 2.31       | 2.39                            | 2.45                            |
| pH (60 °C)           | 1.74    | 2.40       | 2.61      | 1.56       | 1.72       | 1.77                            | 1.83                            |

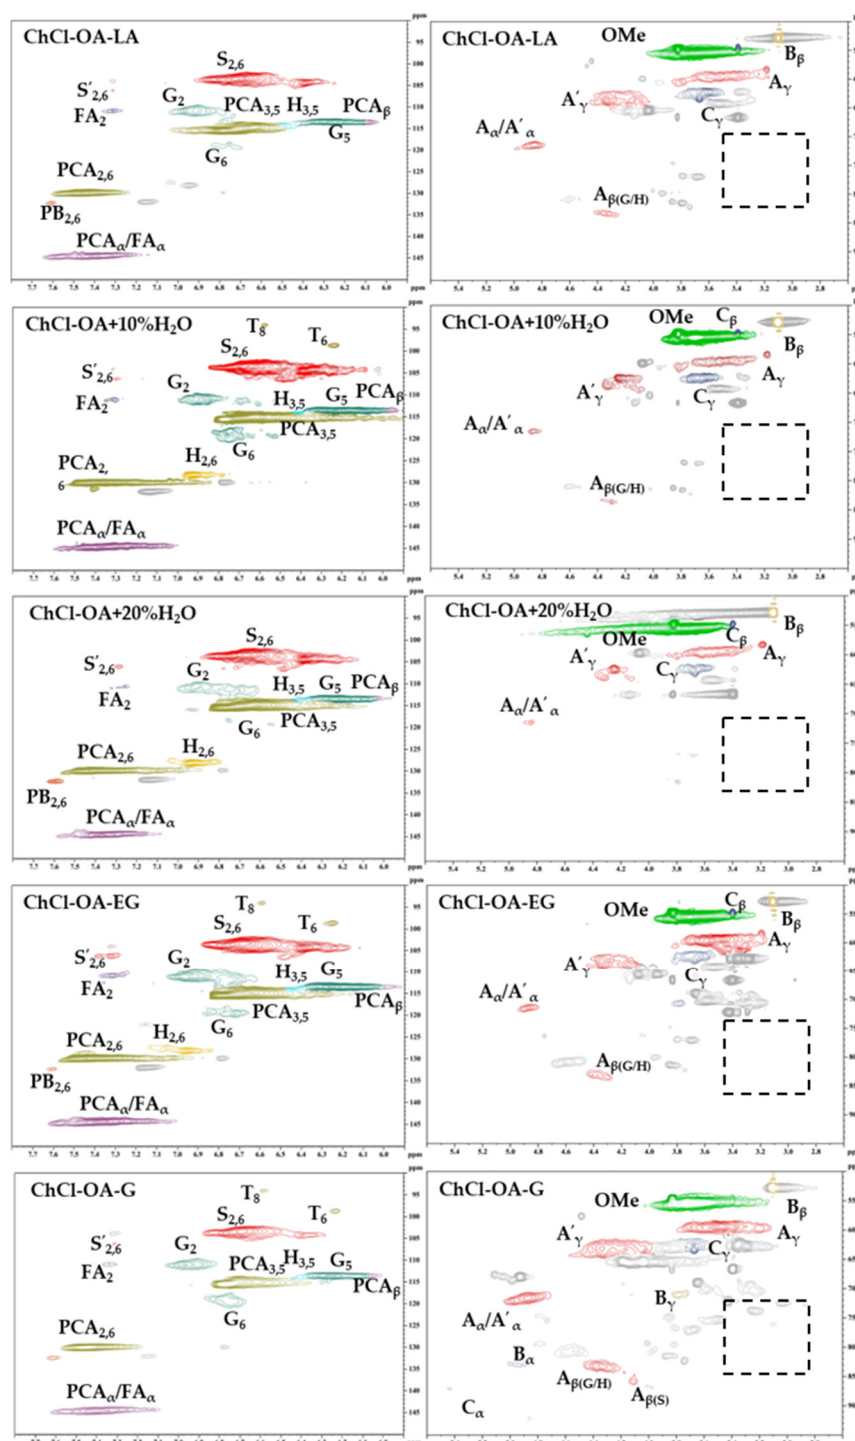

Figure S2. 2D-HSQC NMR spectra of the other DES-L from bagasse.

Table S3. Band assignments for FTIR spectra.

| Band (cm <sup>-1</sup> ) | Assignment                                                |
|--------------------------|-----------------------------------------------------------|
| 3385                     | O-H vibrations                                            |
| 2936                     | -CH stretching on CH <sub>3</sub> and CH <sub>2</sub>     |
| 1730                     | C-O stretch in unconjugated ketone and carboxyl group     |
| 1596                     | Aromatic skeletal vibration breathing with C=C stretching |
| 1512                     | Aromatic skeletal vibration                               |
| 1462                     | -CH asymmetric deformation                                |

|      |                                                                             |
|------|-----------------------------------------------------------------------------|
| 1423 | Aromatic skeletal vibrations                                                |
| 1325 | Syringyl ring breathing with C-O stretching                                 |
| 1270 | Aromatic C-O stretching                                                     |
| 1209 | Guaiacyl ring breathing with C-O stretching                                 |
| 1162 | C-O stretch in ester groups                                                 |
| 1125 | -CH in plane deformation in syringyl ring                                   |
| 1036 | -CH in plane deformation in guaiacyl and CO deformation in primary alcohols |
| 831  | Aromatic out of plane deformation                                           |

**Table S4.** Assignments of  $^{13}\text{C}$ - $^1\text{H}$  cross-peaks in 2D HSQC spectra of the lignin fractions.

| Label                           | $\delta_{\text{C}}/\delta_{\text{H}}$ | Assignment                                                                          |
|---------------------------------|---------------------------------------|-------------------------------------------------------------------------------------|
| B $_{\beta}$                    | 53.7/3.07                             | C $_{\beta}$ -H $_{\beta}$ in $\beta$ - $\beta'$ (resinol) substructures (A)        |
| C $_{\beta}$                    | 53.9/3.45                             | C $_{\beta}$ -H $_{\beta}$ in phenylcoumaran substructures (C)                      |
| OMe                             | 55.5/3.75                             | C-H in methoxyl                                                                     |
| A $_{\gamma}$                   | 60.2/3.62                             | C $_{\gamma}$ -H $_{\gamma}$ in $\beta$ -O-4' substructures (A)                     |
| B $_{\gamma}$                   | 62.6/3.68                             | C $_{\gamma}$ -H $_{\gamma}$ in $\beta$ -5' phenylcoumaran substructures (B)        |
| A' $_{\gamma}$                  | 64.6/4.21                             | C $_{\gamma}$ -H $_{\gamma}$ in $\gamma$ -acylated $\beta$ -O-4' substructures (A') |
| C $_{\gamma}$                   | 71.0/3.70-4.15                        | C $_{\gamma}$ -H $_{\gamma}$ in $\beta$ - $\beta'$ resinol substructures (C)        |
| A $_{\alpha}$                   | 72.2/4.87                             | C $_{\alpha}$ -H $_{\alpha}$ in $\beta$ -O-4' substructures (A)                     |
| A' $_{\alpha}$                  | 81.4/4.76                             | C $_{\alpha}$ -H $_{\alpha}$ in $\alpha$ -etherified $\beta$ -O-4 units             |
| A $_{\beta(\text{G})}$          | 83.1/4.35                             | C $_{\beta}$ -H $_{\beta}$ in $\beta$ -O-4 linked to G/H unit (A)                   |
| B $_{\alpha}$                   | 83.2/4.9                              | C $_{\alpha}$ -H $_{\alpha}$ in $\beta$ - $\beta'$ phenylcoumaran substructures (B) |
| A $_{\beta(\text{S})}$          | 86.6/4.14                             | C $_{\beta}$ -H $_{\beta}$ in $\beta$ -O-4 linked to an S unit (A)                  |
| C $_{\alpha}$                   | 84.2/5.46                             | C $_{\alpha}$ -H $_{\alpha}$ in phenylcoumaran substructures (C)                    |
| T $_{\text{8}}$                 | 94.7/6.58                             | C $_{\text{8}}$ -H $_{\text{8}}$ in tricin (T)                                      |
| T $_{\text{6}}$                 | 99.2/6.32                             | C $_{\text{6}}$ -H $_{\text{6}}$ in tricin (T)                                      |
| S $_{2,6}$                      | 104.5/6.72                            | C $_{2,6}$ -H $_{2,6}$ in syringyl units (S)                                        |
| S' $_{2,6}$                     | 108.7/7.41                            | C $_{2,6}$ -H $_{2,6}$ in oxidized S units (S')                                     |
| G $_{\text{2}}$                 | 116.6/7.01                            | C $_{\text{2}}$ -H $_{\text{2}}$ in guaiacyl units (G)                              |
| G $_{\text{5}}$                 | 115.2/6.72                            | C $_{\text{5}}$ -H $_{\text{5}}$ in guaiacyl units (G)                              |
| G $_{\text{6}}$                 | 119.7/6.81                            | C $_{\text{6}}$ -H $_{\text{6}}$ in guaiacyl units (G)                              |
| H $_{3,5}$                      | 114.5/6.62                            | C $_{3,5}$ -H $_{3,5}$ in <i>p</i> -hydroxyphenyl units (H) and Proteins            |
| PCA $_{\beta}$ /FA $_{\beta}$   | 114.5/6.48                            | C $_{\beta}$ -H $_{\beta}$ in <i>p</i> -coumarates (PCA) and ferulates (FA)         |
| PCA $_{3,5}$                    | 116.3/6.80                            | C $_{3,5}$ -H $_{3,5}$ in <i>p</i> -coumaric acid (PCA)                             |
| FA $_{\text{2}}$                | 111.3/7.31                            | C $_{\text{2}}$ -H $_{\text{2}}$ in ferulate (FA)                                   |
| H $_{2,6}$                      | 127.7/7.21                            | C $_{2,6}$ -H $_{2,6}$ in <i>p</i> -hydroxyphenyl units (H) and proteins            |
| PCA $_{2,6}$                    | 130.72/7.47                           | C $_{2,6}$ -H $_{2,6}$ in <i>p</i> -coumarates (PCA)                                |
| PCA $_{\alpha}$ /FA $_{\alpha}$ | 145.3/7.43                            | C $_{\alpha}$ -H $_{\alpha}$ in <i>p</i> -coumarates (PCA) and ferulates (FA)       |
| PB $_{2,6}$                     | 133.1/7.63                            | C $_{2,6}$ -H $_{2,6}$ in <i>p</i> -Hydroxybenzoate                                 |
| FA $_{\text{2}}$                | 111.3/7.31                            | C $_{\text{2}}$ -H $_{\text{2}}$ in ferulate (FA)                                   |

**Table S5.** The TG analysis of bagasse treated with different DESs.

| Pretreatment Solvent | Mass loss (%) |           | T $_{\text{onset}}$ / °C | T $_{\text{max}}$ / °C |
|----------------------|---------------|-----------|--------------------------|------------------------|
|                      | 50-310°C      | 310-500°C |                          |                        |
| Raw                  | 23.37         | 78.49     | 213.2                    | 339.3                  |
| ChCl-OA-EG           | 16.73         | 90.07     | 218.5                    | 358.9                  |
| ChCl-OA-G            | 16.21         | 89.13     | 217.9                    | 359.1                  |
| ChCl-OA-LA           | 14.70         | 89.03     | 220.3                    | 355.1                  |
| ChCl-OA-MA           | 13.14         | 92.73     | 222.6                    | 357.6                  |

|                              |       |       |       |       |
|------------------------------|-------|-------|-------|-------|
| ChCl-OA+10% H <sub>2</sub> O | 17.77 | 86.90 | 218.3 | 354.9 |
| ChCl-OA+20% H <sub>2</sub> O | 13.27 | 86.30 | 219.7 | 356.8 |

T<sub>onset</sub>/°C, the pronounced decomposition onset temperature. T<sub>max</sub>/°C, the maximum decomposition rate temperature.

**Table S6.** The TG analysis of different DES-Ls.

| Pretreatment Solvent         | Mass loss (%) |           | T <sub>onset</sub> / °C | T <sub>max</sub> / °C |
|------------------------------|---------------|-----------|-------------------------|-----------------------|
|                              | 50-300°C      | 300-600°C |                         |                       |
| Raw                          | 32.64         | 79.86     | 201.1                   | 290.6                 |
| ChCl-OA-EG                   | 34.72         | 69.82     | 206.3                   | 261.2                 |
| ChCl-OA-G                    | 33.16         | 70.41     | 200.8                   | 237.3                 |
| ChCl-OA-LA                   | 19.94         | 59.13     | 214.1                   | 358.1                 |
| ChCl-OA-MA                   | 21.14         | 62.01     | 190.4                   | 357.2                 |
| ChCl-OA+10% H <sub>2</sub> O | 26.32         | 57.65     | 200.6                   | 265.1                 |
| ChCl-OA+20% H <sub>2</sub> O | 34.11         | 68.39     | 198.4                   | 261.9                 |

T<sub>onset</sub>/°C, the pronounced decomposition onset temperature. T<sub>max</sub>/°C, the maximum decomposition rate temperature.
